# Supplementary material for: Effect of outdoor air pollution on asthma exacerbations in children and adults: Systematic review and multilevel meta-analysis
Source: PubMed Central journal article supplement (PMC5358780; doi:10.1371/journal.pone.0174050), 2017-03-20
Supplement: pone.0174050.s002.pdf [file pone.0174050.s002.pdf]

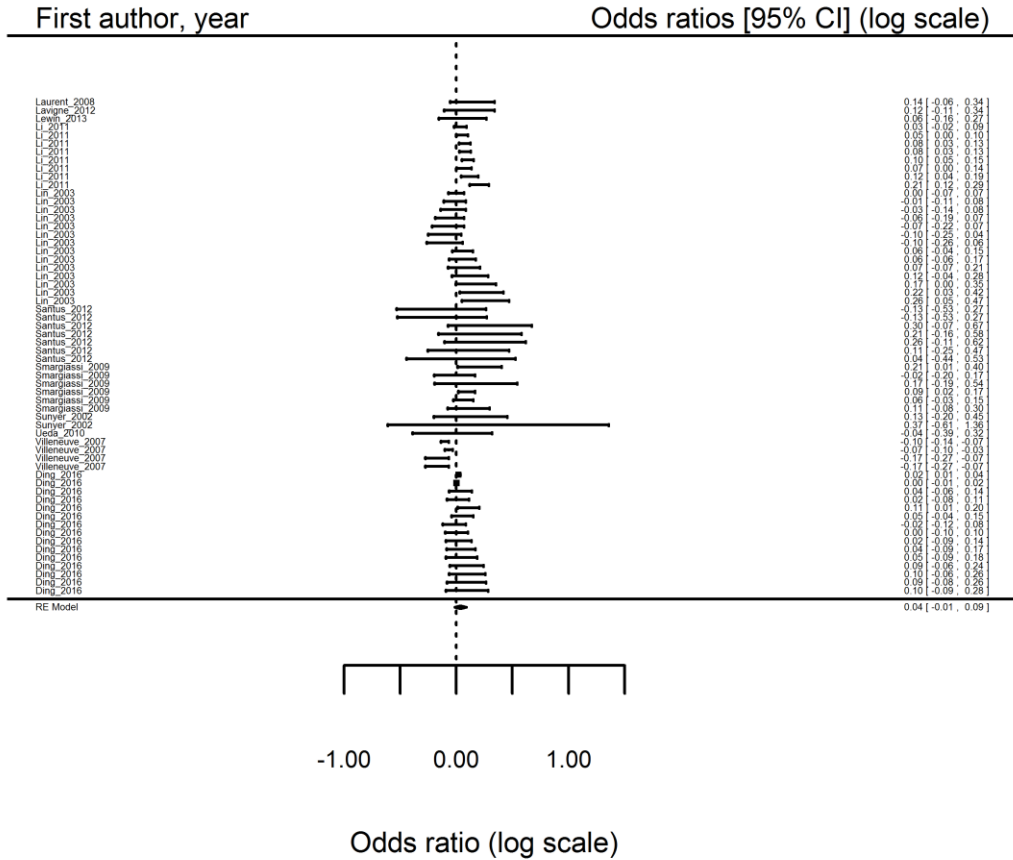

**Forest plot of 11 studies examining the association between SO<sub>2</sub> and asthma exacerbations.**

Each study reports one or more time-lags. The pooled odds ratio in logarithmic scale is indicated at the bottom of the figure.



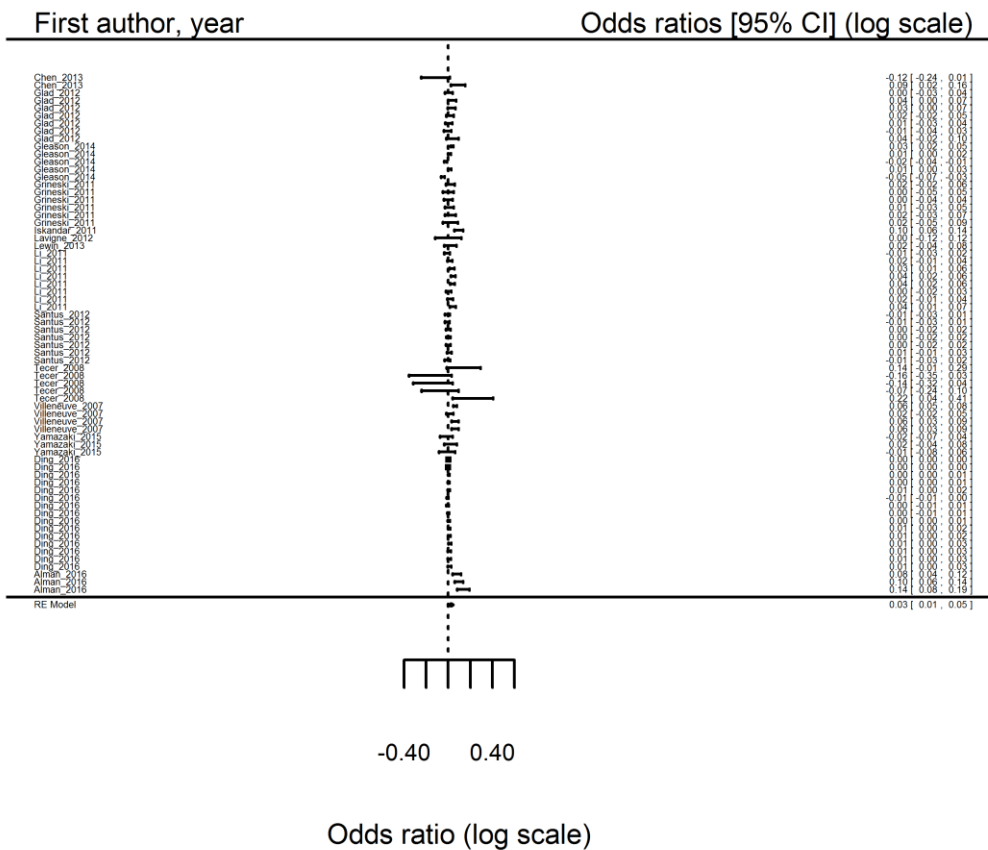

**Forest plot of 14 studies examining the association between PM<sub>2.5</sub> and asthma exacerbations.**

Each study reports one or more time-lags. The pooled odds ratio in logarithmic scale is indicated at the bottom of the figure.

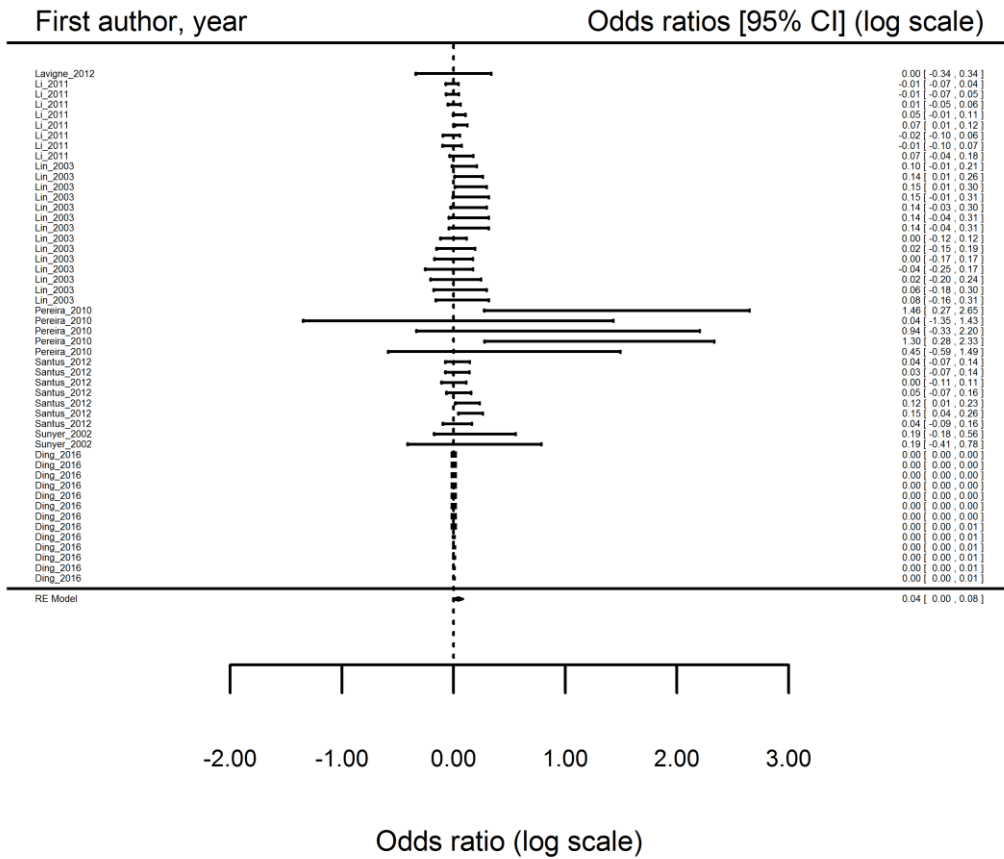

**Forest plot of 7 studies examining the association between CO and asthma exacerbations.**

Each study reports one or more time-lags. The pooled odds ratio in logarithmic scale is indicated at the bottom of the figure.

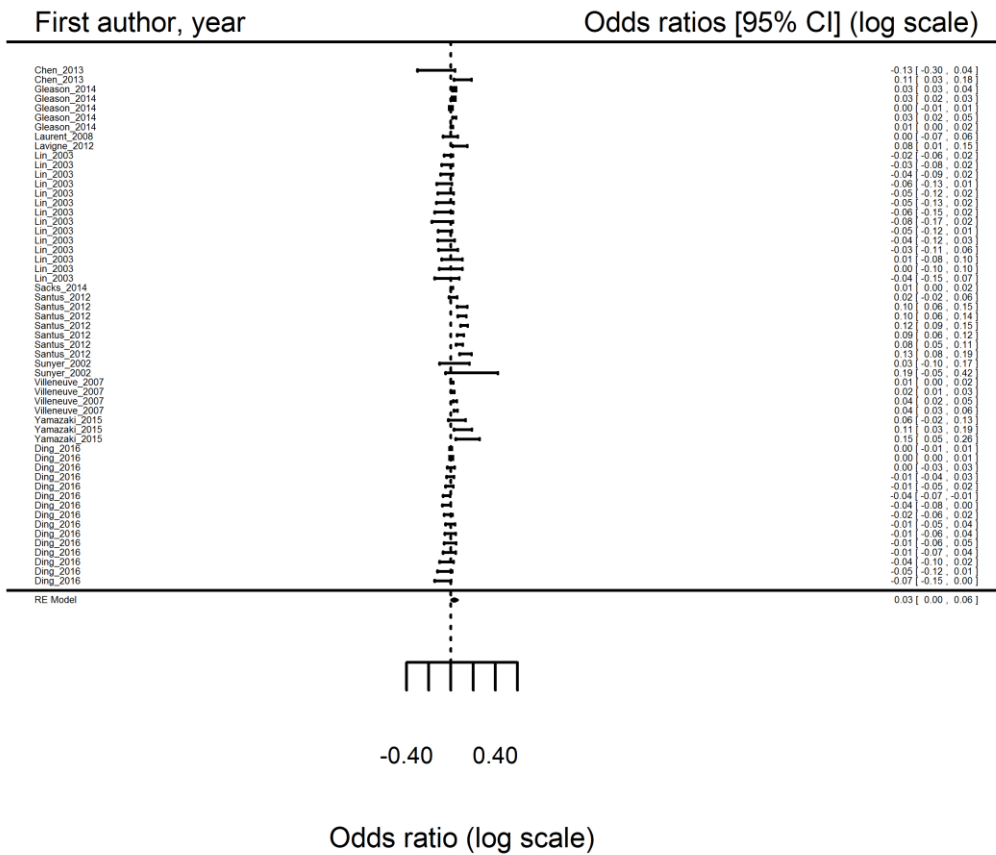

**Forest plot of 11 studies examining the association between O<sub>3</sub> and asthma exacerbations.**

Each study reports one or more time-lags. The pooled odds ratio in logarithmic scale is indicated at the bottom of the figure.
