# Supplementary material for: Effect of outdoor air pollution on asthma exacerbations in children and adults: Systematic review and multilevel meta-analysis
Source: PubMed Central journal article supplement (PMC5358780; doi:10.1371/journal.pone.0174050), 2017-03-20
Supplement: pone.0174050.s004.pdf [file pone.0174050.s004.pdf]

**S2 Table. Detailed literature search.**

**October 17, 2016**

**PubMed**

(asthma [Title/Abstract] OR wheeze[Title/Abstract]) AND (pollut\*[Title/Abstract] OR contamin\*[Title/Abstract]) AND (hospitaliz\*[ Title/Abstract] OR admission\*[ Title/Abstract] OR emergenc\*[ Title/Abstract] OR attack\*[ Title/Abstract]) AND "case crossover" [ Title/Abstract]

**Scopus**

TITLE-ABS-KEY ((asthma OR wheeze) AND (pollut\* OR contamin\*) AND (hospitaliz\* OR admission\* OR emergenc\* OR attack\*)) AND "case crossover")

**Google Scholar**

(intitle:asthma OR intitle:wheeze) AND (intitle:pollutants OR intitle:pollution OR intitle:contaminants OR intitle:contamination) AND (intitle:hospitalizations OR intitle:admissions OR intitle:emergency OR intitle:attack) AND ("case crossover")
