# Supplementary material for: Effect of outdoor air pollution on asthma exacerbations in children and adults: Systematic review and multilevel meta-analysis
Source: PubMed Central journal article supplement (PMC5358780; doi:10.1371/journal.pone.0174050), 2017-03-20
Supplement: pone.0174050.s005.pdf [file pone.0174050.s005.pdf]

**S3 Table. Newcastle-Ottawa criteria.**

| NOS question                                                               | NOS criteria applied to this study                                                                  |
|----------------------------------------------------------------------------|-----------------------------------------------------------------------------------------------------|
| <b>Selection</b>                                                           |                                                                                                     |
| Is the case definition adequate?                                           | Revision of clinical histories or primary record sources (1 star)                                   |
| Representativeness of the Cases                                            | Cases from all hospitals or clinics, or a representative sample of cases (1 star)                   |
| Selection of Controls                                                      | Always 1 star                                                                                       |
| Definition of Controls                                                     | Exclusion of patients with more than one exacerbation during a given period of time (1 star)        |
| <b>Comparability</b>                                                       |                                                                                                     |
| Comparability of cases and controls on the basis of the design or analysis | Always 1 star<br><br>Control by the day of the week and temperature or humidity (1 additional star) |
| <b>Exposure</b>                                                            |                                                                                                     |
| Ascertainment of exposure                                                  | Residential address of cases was verified (1 star)                                                  |
| Same method of ascertainment for cases and controls                        | Always 1 star                                                                                       |
| Non-response rate                                                          | Always 1 star                                                                                       |

NOS: Newcastle-Ottawa scale.
