# Supplementary material for: Effect of outdoor air pollution on asthma exacerbations in children and adults: Systematic review and multilevel meta-analysis
Source: PubMed Central journal article supplement (PMC5358780; doi:10.1371/journal.pone.0174050), 2017-03-20
Supplement: pone.0174050.s006.pdf [file pone.0174050.s006.pdf]

**S4 Table. Multilevel meta-regression for the sensitivity analysis.**

| Pollutant         | Moderators                 | Q <sub>E</sub><br>(P-value) |
|-------------------|----------------------------|-----------------------------|
| NO <sub>2</sub>   | Lag + Latitude + Elevation | 0.33                        |
| SO <sub>2</sub>   | Lag + Latitude + Elevation | 0.16                        |
| PM <sub>10</sub>  | Lag + Latitude + Elevation | 0.68                        |
| PM <sub>2.5</sub> | Lag + Latitude + Elevation | 0.06                        |
| CO                | Lag + Latitude + Elevation | 0.99                        |
| O <sub>3</sub>    | Lag + Latitude + Elevation | 0.12                        |

NO<sub>2</sub>: nitrogen dioxide; SO<sub>2</sub>: sulfur dioxide; O<sub>3</sub>: ozone; CO: carbon monoxide; PM<sub>10</sub>: particulate matter < 10 μm; PM<sub>2.5</sub>: particulate matter < 2.5 μm; Q<sub>E</sub>: test for residual heterogeneity.
